# Supplementary material for: Safety and Tolerability of Adjunctive Brivaracetam in Pediatric Patients < 16 Years with Epilepsy: An Open-Label Trial
Source: Springer Nature journal article supplement (doi:10.1007/s40272-019-00332-y), 2019-06-28
Supplement: MOESM1 [file 24128628]

## **Electronic Supplementary Material**

### **Safety and Tolerability of Adjunctive Brivaracetam in Pediatric Patients < 16 Years with Epilepsy: An Open-Label Trial**

Edwin Liu<sup>1\*</sup> · Deanne Dilley<sup>2,3</sup> · Belinda McDonough<sup>4,5</sup> · Armel Stockis<sup>6</sup> · Tony Daniels<sup>2</sup>

<sup>1</sup>Pediatric Neurologists of Palm Beach, 12959 Palms West Drive, Suite 120, Loxahatchee, FL 33470, USA

<sup>2</sup>UCB Pharma, 8010 Arco Corporate Drive, Raleigh, NC 27617, USA

<sup>3</sup>Statistics and Data Corporation, Tempe, AZ, USA

<sup>4</sup>UCB Pharma, 208 Bath Road, Slough, SL1 3WE, UK

<sup>5</sup>MAFSAF Ltd, Belfast, Northern Ireland, UK

<sup>6</sup>UCB Pharma, Chemin du Foriest, 1420 Braine l'Alleud, Belgium

\*Corresponding author: Edwin Liu, Pediatric Neurologists of Palm Beach, 12959 Palms West Drive, Suite 120, Loxahatchee, FL 33470, USA; Tel.: +1 561 753 8888; Fax: +1 561 795 5004; E-mail: [eliumd@hotmail.com](mailto:eliumd@hotmail.com)

**Table S1** Baseline demographic and epilepsy characteristics (safety set)

|                                                               | Age group                                   |                                     |                                      |
|---------------------------------------------------------------|---------------------------------------------|-------------------------------------|--------------------------------------|
|                                                               | 1 month to<br>< 2 years<br>( <i>n</i> = 30) | 2 to < 12 years<br>( <i>n</i> = 51) | 12 to < 16 years<br>( <i>n</i> = 18) |
| Age, median (min, max), years                                 | 1.3<br>(0.2, 1.9)                           | 5.9<br>(2.1, 11.9)                  | 13.7<br>(12.1, 15.6)                 |
| Weight, median (min, max), kg                                 | 9.1<br>(3.6, 15.2)                          | 21.0<br>(9.5, 55.9)                 | 46.5<br>(36.0, 75.0)                 |
| BMI, mean (SD), kg/m <sup>2</sup>                             | 16.1 (2.7)                                  | 16.8 (3.5)                          | 19.8 (2.9)                           |
| Male, <i>n</i> (%)                                            | 15 (50.0)                                   | 26 (51.0)                           | 7 (38.9)                             |
| Race, <i>n</i> (%)                                            |                                             |                                     |                                      |
| White                                                         | 22 (73.3)                                   | 42 (82.4)                           | 15 (83.3)                            |
| Black                                                         | 0                                           | 3 (5.9)                             | 1 (5.6)                              |
| Asian                                                         | 0                                           | 0                                   | 0                                    |
| Other                                                         | 8 (26.7)                                    | 6 (11.8)                            | 2 (11.1)                             |
| Seizure type, <sup>a</sup> <i>n</i> (%)                       |                                             |                                     |                                      |
| Focal seizures                                                | 14 (46.7)                                   | 26 (51.0)                           | 10 (55.6)                            |
| Primary generalized seizures                                  | 16 (53.3)                                   | 25 (49.0)                           | 8 (44.4)                             |
| Baseline seizure days, <sup>b</sup> mean (SD)                 | 20.0 (10.0)                                 | 15.1 (11.3)                         | 12.0 (10.9)                          |
| Number of prior AEDs, <i>n</i> (%)                            |                                             |                                     |                                      |
| 0–1                                                           | 19 (63.3)                                   | 12 (23.5)                           | 6 (33.3)                             |
| 2–4                                                           | 10 (33.3)                                   | 15 (29.4)                           | 7 (38.9)                             |
| ≥ 5                                                           | 1 (3.3)                                     | 24 (47.1)                           | 5 (27.8)                             |
| Number of concomitant AEDs, (%)                               |                                             |                                     |                                      |
| 1                                                             | 12 (40.0)                                   | 15 (29.4)                           | 5 (27.8)                             |
| 2                                                             | 15 (50.0)                                   | 19 (37.3)                           | 7 (38.9)                             |
| 3                                                             | 3 (10.0)                                    | 17 (33.3)                           | 6 (33.3)                             |
| Most frequently used concomitant AEDs (≥ 10% of all patients) |                                             |                                     |                                      |
| Valproic acid                                                 | 17 (56.7)                                   | 24 (47.1)                           | 10 (55.6)                            |

|                                                |           |           |           |
|------------------------------------------------|-----------|-----------|-----------|
| Topiramate                                     | 7 (23.3)  | 18 (35.3) | 2 (11.1)  |
| Lamotrigine                                    | 1 (3.3)   | 11 (21.6) | 5 (27.8)  |
| Clobazam                                       | 4 (13.3)  | 8 (15.7)  | 2 (11.1)  |
| Phenobarbital                                  | 10 (33.3) | 3 (5.9)   | 1 (5.6)   |
| Oxcarbazepine                                  | 3 (10.0)  | 4 (7.8)   | 6 (33.3)  |
| <hr/>                                          |           |           |           |
| Epilepsy duration, mean (SD), years            | 0.7 (0.4) | 4.1 (2.7) | 8.0 (4.8) |
| <hr/>                                          |           |           |           |
| Age at time of first seizure, mean (SD), years | 0.5 (0.4) | 2.6 (2.8) | 5.8 (4.4) |
| <hr/>                                          |           |           |           |
| Epileptic syndrome, <sup>c</sup> <i>n</i> (%)  |           |           |           |
| Localization-related                           | 15 (50.0) | 26 (51.0) | 10 (55.6) |
| Idiopathic                                     | 1 (3.3)   | 1 (2.0)   | 0         |
| Cryptogenic or symptomatic                     | 14 (46.7) | 25 (49.0) | 10 (55.6) |
| Generalized                                    | 11 (36.7) | 21 (41.2) | 8 (44.4)  |
| Idiopathic                                     | 1 (3.3)   | 6 (11.8)  | 5 (27.8)  |
| Cryptogenic or symptomatic                     | 7 (23.3)  | 10 (19.6) | 3 (16.7)  |
| Symptomatic                                    | 3 (10.0)  | 7 (13.7)  | 0         |
| Undetermined <sup>d</sup>                      | 7 (23.3)  | 6 (11.8)  | 0         |
| Generalized and focal features                 | 1 (3.3)   | 5 (9.8)   | 0         |
| Other <sup>e</sup>                             | 6 (20.0)  | 1 (2.0)   | 0         |
| Special syndromes                              | 1 (3.3)   | 3 (5.9)   | 0         |
| Situation-related seizures                     | 0         | 3 (5.9)   | 0         |

*AED* antiepileptic drug, *BMI* body mass index, *max* maximum value, *min* minimum value, *SD* standard deviation

<sup>a</sup>Seizure type was defined as follows: focal seizures included individuals with a history of only Type I seizures at baseline. The category for primary generalized seizures included individuals with Type II seizures or mixed seizure disorders

<sup>b</sup>Mean number of seizure days standardized to a 28-day duration, during the observed baseline period

<sup>c</sup>Patients could be classified into multiple categories

<sup>d</sup>Epilepsies and syndromes undetermined as focal or generalized

<sup>e</sup>Other indeterminate epilepsies without unequivocal focal or generalized features

**Table S2** Incidence of TEAEs and drug-related TEAEs reported by  $\geq 3\%$  of all patients (safety set)

| <i>n</i> (%)                                                                                   | Age group                                   |                                     |                                      |
|------------------------------------------------------------------------------------------------|---------------------------------------------|-------------------------------------|--------------------------------------|
|                                                                                                | 1 month to<br>< 2 years<br>( <i>n</i> = 30) | 2 to < 12 years<br>( <i>n</i> = 51) | 12 to < 16 years<br>( <i>n</i> = 18) |
| At least one TEAE                                                                              | 24 (80.0)                                   | 31 (60.8)                           | 11 (61.1)                            |
| TEAEs (MedDRA Version 15.0 Preferred Term) reported by $\geq 3\%$ of all patients              |                                             |                                     |                                      |
| Convulsion                                                                                     | 5 (16.7)                                    | 3 (5.9)                             | 2 (11.1)                             |
| Somnolence                                                                                     | 2 (6.7)                                     | 3 (5.9)                             | 3 (16.7)                             |
| Pyrexia                                                                                        | 7 (23.3)                                    | 1 (2.0)                             | 0                                    |
| Irritability                                                                                   | 5 (16.7)                                    | 2 (3.9)                             | 1 (5.6)                              |
| Decreased<br>appetite                                                                          | 3 (10.0)                                    | 3 (5.9)                             | 1 (5.6)                              |
| Pharyngotonsillitis                                                                            | 4 (13.3)                                    | 1 (2.0)                             | 0                                    |
| Fatigue                                                                                        | 0                                           | 3 (5.9)                             | 2 (11.1)                             |
| Dehydration                                                                                    | 4 (13.3)                                    | 0                                   | 0                                    |
| Diarrhea                                                                                       | 3 (10.0)                                    | 1 (2.0)                             | 0                                    |
| Otitis media                                                                                   | 2 (6.7)                                     | 2 (3.9)                             | 0                                    |
| Psychomotor<br>hyperactivity                                                                   | 0                                           | 4 (7.8)                             | 0                                    |
| Aggression                                                                                     | 0                                           | 2 (3.9)                             | 2 (11.1)                             |
| Headache                                                                                       | 0                                           | 2 (3.9)                             | 1 (5.6)                              |
| At least one drug-<br>related TEAE <sup>a</sup>                                                | 5 (16.7)                                    | 21 (41.2)                           | 6 (33.3)                             |
| Drug-related TEAEs (MedDRA Version 15.0 Preferred Term) reported by $\geq 3\%$ of all patients |                                             |                                     |                                      |
| Somnolence                                                                                     | 1 (3.3)                                     | 3 (5.9)                             | 3 (16.7)                             |
| Decreased<br>appetite                                                                          | 2 (6.7)                                     | 3 (5.9)                             | 1 (5.6)                              |
| Fatigue                                                                                        | 0                                           | 3 (5.9)                             | 1 (5.6)                              |

|                           |   |         |         |
|---------------------------|---|---------|---------|
| Irritability              | 0 | 2 (3.9) | 1 (5.6) |
| Psychomotor hyperactivity | 0 | 3 (5.9) | 0       |
| Aggression                | 0 | 2 (3.9) | 1 (5.6) |

---

*MedDRA* Medical Dictionary for Regulatory Activities, *TEAE* treatment-emergent adverse event

Note: *n* = number of patients reporting a TEAE for the combined evaluation, down-titration, and safety periods. Percentages are relative to the number of patients in the safety set

<sup>a</sup>Adverse events were considered related to the trial drug if either the relationship to trial drug was specified as related by the investigator, or if the relationship to trial drug was not specified

**Table S3** Trough concentrations of brivaracetam and its metabolites during the evaluation period (pharmacokinetic per-protocol set)

|                                                  | Trough plasma concentration ( $\mu\text{g/mL}$ ) <sup>a</sup> , geometric mean (geometric CV%) |                  |                  |
|--------------------------------------------------|------------------------------------------------------------------------------------------------|------------------|------------------|
|                                                  | 1 month to < 2 years                                                                           | 2 to < 12 years  | 12 to < 16 years |
| End of first dosing week <sup>b</sup> – Visit 3  | ( <i>n</i> = 18)                                                                               | ( <i>n</i> = 27) | ( <i>n</i> = 11) |
| Brivaracetam                                     | 0.206 (86.0)                                                                                   | 0.214 (66.7)     | 0.300 (134.2)    |
| BRV-OH                                           | 0.059 (67.0)                                                                                   | 0.068 (42.3)     | 0.045 (34.9)     |
| BRV-OHAC                                         | 0.005 (42.4)                                                                                   | 0.007 (48.3)     | 0.008 (46.6)     |
| BRV-AC                                           | 0.009 (103.8)                                                                                  | 0.014 (102.2)    | 0.018 (100.8)    |
| End of second dosing week <sup>c</sup> – Visit 4 | <i>n</i> = 15                                                                                  | <i>n</i> = 24    | <i>n</i> = 4     |
| Brivaracetam                                     | 0.343 (80.1)                                                                                   | 0.451 (64.4)     | 0.530 (46.5)     |
| BRV-OH                                           | 0.124 (61.1)                                                                                   | 0.121 (57.0)     | 0.126 (18.8)     |
| BRV-OHAC                                         | 0.011 (37.3)                                                                                   | 0.013 (41.9)     | 0.018 (14.7)     |
| BRV-AC                                           | 0.017 (92.2)                                                                                   | 0.027 (79.6)     | 0.039 (61.1)     |
| End of third dosing week <sup>d</sup> – Visit 5  | <i>n</i> = 12                                                                                  | <i>n</i> = 22    | <i>n</i> = 4     |
| Brivaracetam                                     | 0.596 (138.0)                                                                                  | 0.827 (65.8)     | 1.065 (36.8)     |
| BRV-OH                                           | 0.222 (79.1)                                                                                   | 0.274 (49.5)     | 0.225 (20.0)     |
| BRV-OHAC                                         | 0.018 (64.2)                                                                                   | 0.025 (44.4)     | 0.034 (31.0)     |
| BRV-AC                                           | 0.027 (163.5)                                                                                  | 0.055 (75.3)     | 0.086 (55.1)     |

<sup>a</sup>Multiply by 4.713646 to convert concentrations from  $\mu\text{g/mL}$  to  $\mu\text{mol/L}$ . Metabolite concentrations are expressed in brivaracetam-equivalents and use the same conversion factor

<sup>b</sup>Low dose

<sup>c</sup>Mid dose

<sup>d</sup>High dose

*BRV-AC* acid metabolite of brivaracetam, *BRV-OH* hydroxy metabolite of brivaracetam, *BRV-OHAC* hydroxy acid metabolite of brivaracetam, *CV* coefficient of variation

**Table S4** Seizure days (full analysis set)

|                                                                                | Patients with focal seizures <sup>a</sup>               |                                     |                                     |
|--------------------------------------------------------------------------------|---------------------------------------------------------|-------------------------------------|-------------------------------------|
|                                                                                | 1 month to < 2 years<br>( <i>n</i> = 14)                | 2 to < 12 years<br>( <i>n</i> = 25) | 12 to < 16 years<br>( <i>n</i> = 9) |
| Number of seizure days, <sup>b</sup> median                                    |                                                         |                                     |                                     |
| Baseline period                                                                | 19.7                                                    | 8.0                                 | 0.0                                 |
| Evaluation period                                                              | 14.6                                                    | 4.0                                 | 2.7                                 |
| Absolute reduction from baseline in number of seizure days, median             | 4.0                                                     | 0.0                                 | 0.0                                 |
| Percent reduction from baseline in number of seizure days, <sup>c</sup> median | 23.7                                                    | 4.8                                 | 1.4                                 |
|                                                                                | Patients with primary generalized seizures <sup>d</sup> |                                     |                                     |
|                                                                                | 1 month to < 2 years<br>( <i>n</i> = 16)                | 2 to < 12 years<br>( <i>n</i> = 25) | 12 to < 16 years<br>( <i>n</i> = 8) |
| Number of seizure days, <sup>b</sup> median                                    |                                                         |                                     |                                     |
| Baseline period                                                                | 26.0                                                    | 20.0                                | 17.3                                |
| Evaluation period                                                              | 22.5                                                    | 24.0                                | 10.0                                |
| Absolute reduction from baseline in number of seizure days, median             | 0.6                                                     | 0.0                                 | 4.0                                 |
| Percent reduction from baseline in number of seizure days, <sup>e</sup> median | 4.2                                                     | 0.0                                 | 23.8                                |

<sup>a</sup>Patients with a history of focal seizures with or without secondary generalization and no primary generalized seizures at baseline

<sup>b</sup>Number of seizure days, standardized to a 28-day duration

<sup>c</sup>Patients with a zero seizure count during the baseline period (*n* = 13) were excluded from the percent reduction analysis as percent change from baseline could not be calculated

<sup>d</sup>Patients with a history of primary generalized seizures at baseline; patients could also have had focal seizures

<sup>e</sup>Patients with a zero seizure count during the baseline period (*n* = 4) were excluded from the percent reduction analysis as percent change from baseline could not be calculated

**Fig. S1** Responder rate based on a  $\geq 50\%$  reduction in seizure days from the baseline period to the end of the evaluation period, according to seizure diary data overall, and by age and seizure category (FAS population)

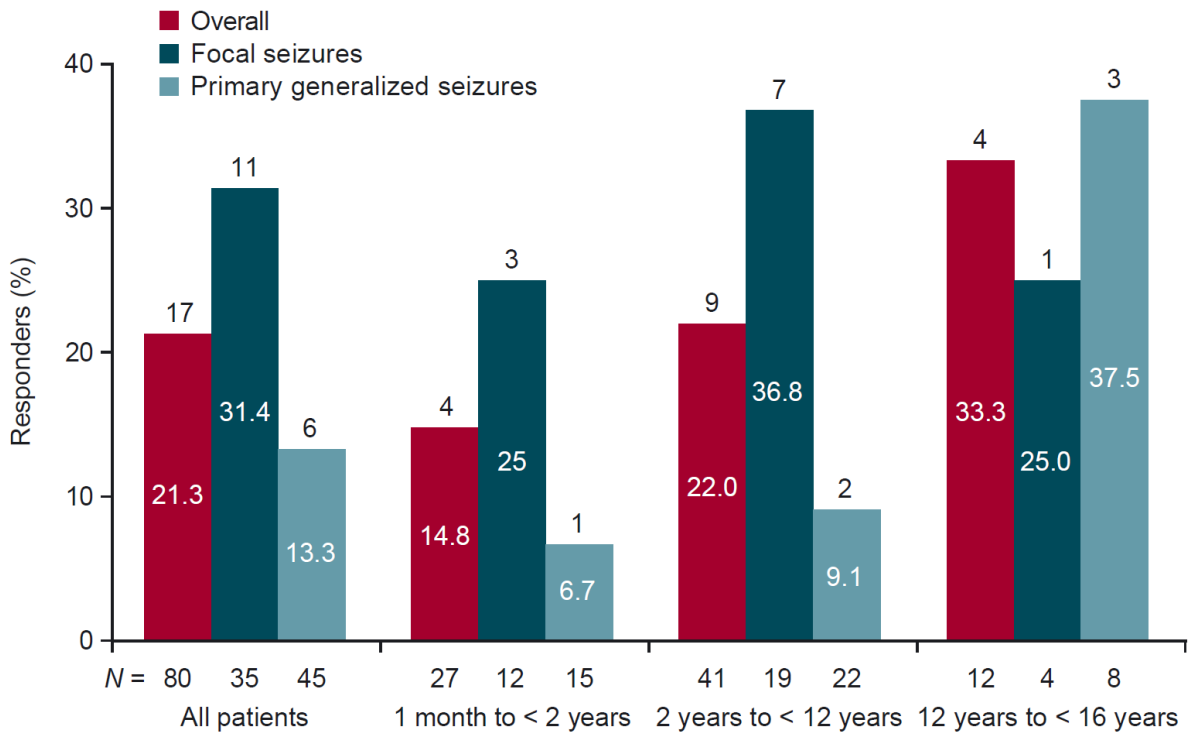

*FAS full analysis set*

Note: Patients with a zero seizure count during the baseline period were excluded from the analysis as percent change from baseline could not be calculated. Numbers above bars represent the number of patients who responded to treatment.



**Fig. S2** Individual plasma concentration versus time profiles for brivaracetam at the low (Day 7), mid (Day 14), and high (Day 21) dose levels

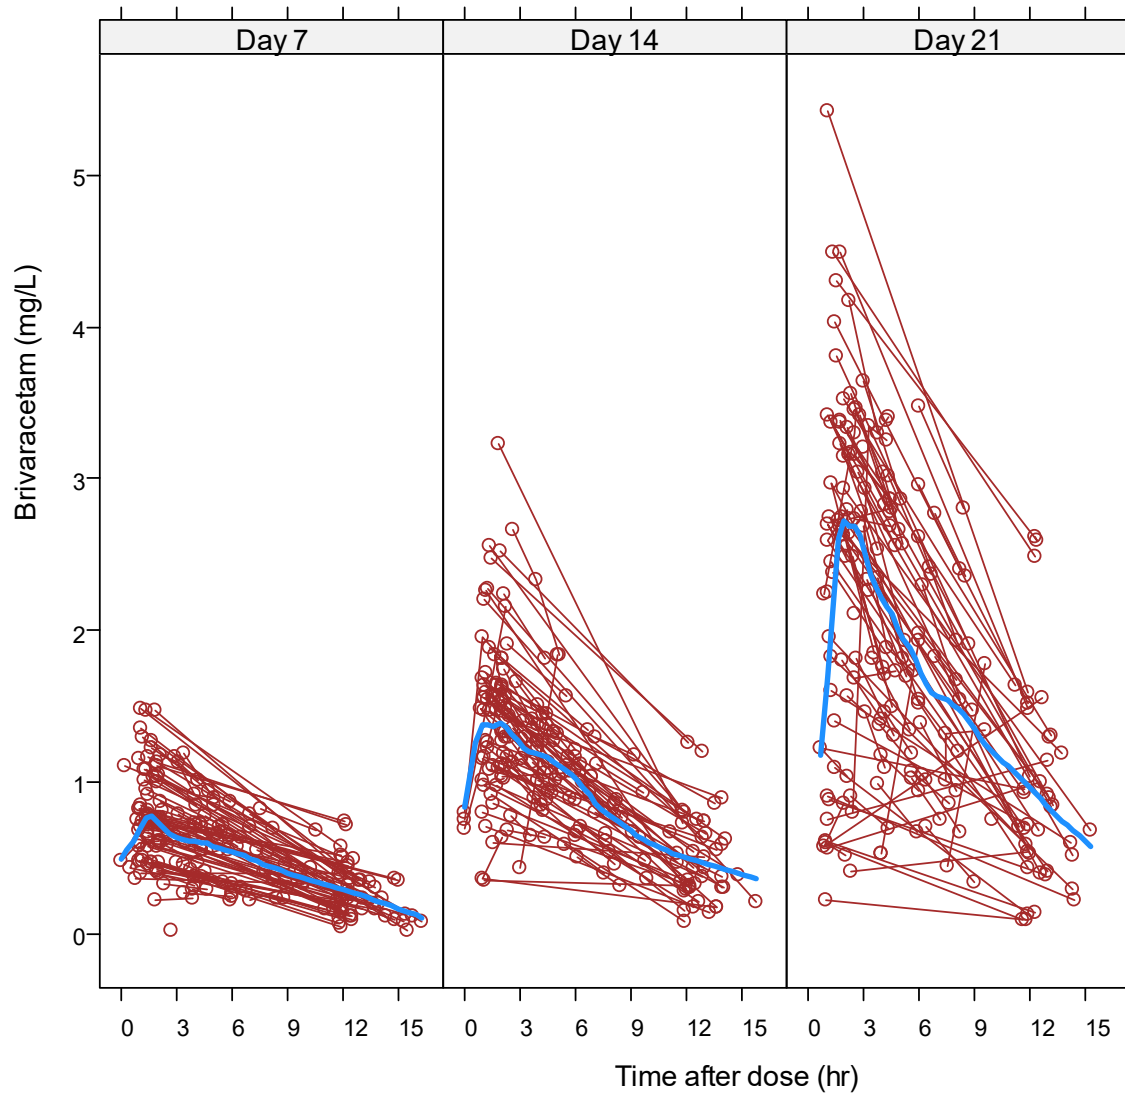

Blue lines are Loess smoothing curves

**Fig. S3** Predose plasma brivaracetam concentration versus mg/kg dose in the overall population

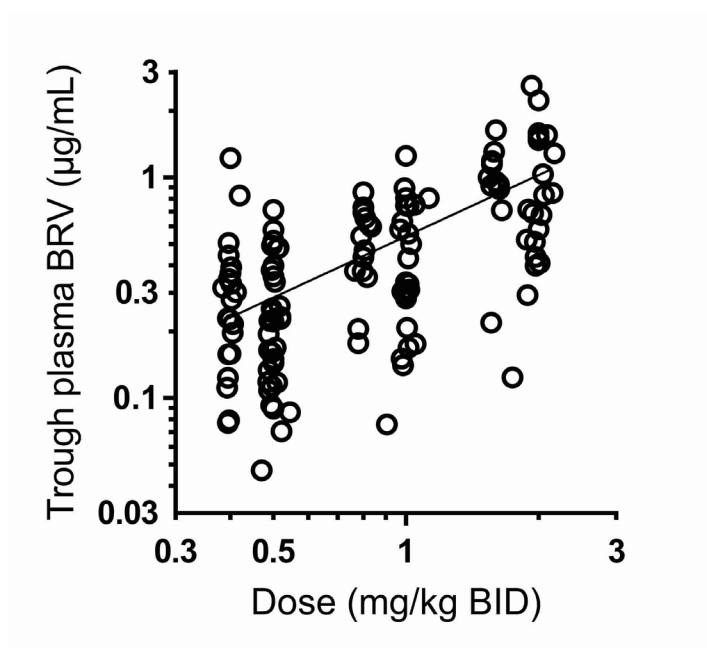

*BID* twice daily, *BRV* brivaracetam
